# Supplementary material for: Lipid bilayer membranes with asymmetrically distributed LPC and DAG
Source: Royal Society of Chemistry journal article supplement (doi:10.1039/d5cp03245h), 2026-01-01
Supplement: d5cp03245h1.pdf [file d5cp03245h1.pdf]

*Supplementary Information for:*

**Lipid Bilayer Membranes with Asymmetrically  
Distributed LPC and DAG**

Chang Liu<sup>1,2</sup>, Zhongjie Han<sup>1,2</sup>, Rui Ma<sup>3,\*</sup>, and Chen Song<sup>1,2,\*</sup>

<sup>1</sup>Center for Quantitative Biology, Academy for Advanced Interdisciplinary Studies,  
Peking University, Beijing 100871, China

<sup>2</sup>Peking-Tsinghua Center for Life Sciences, Academy for Advanced Interdisciplinary  
Studies, Peking University, Beijing 100871, China

<sup>3</sup>College of Physical Science and Technology, Xiamen University, Xiamen 361005,  
China

\*E-mail: ruima@xmu.edu.cn (RM), c.song@pku.edu.cn (CS)

## Supplementary Table

**Table S1:** List of the simulation surface area.

|                                | Upper Leaflet : Lower Leaflet                       | Surface Area (nm <sup>2</sup> ) |
|--------------------------------|-----------------------------------------------------|---------------------------------|
| Symmetric Bilayer Composition  | POPC : POPC                                         | 40.70 ± 0.92                    |
|                                | POPC/LPC12 : POPC/LPC12                             | 48.14 ± 0.10                    |
|                                | POPC/LPC14 : POPC/LPC14                             | 47.91 ± 0.95                    |
|                                | POPC/LPC16 : POPC/LPC16                             | 47.78 ± 0.33                    |
|                                | POPC/PIP <sub>2</sub> : POPC/PIP <sub>2</sub> (n=1) | 39.35 ± 0.80                    |
|                                | POPC/DAG : POPC/DAG (n=1)                           | 37.01 ± 0.92                    |
|                                | POPC/PIP <sub>2</sub> : POPC/PIP <sub>2</sub> (n=2) | 39.60 ± 1.11                    |
|                                | POPC/DAG : POPC/DAG (n=2)                           | 37.21 ± 0.93                    |
| Asymmetric Bilayer Composition | POPC : POPC/LPC12                                   | 44.67 ± 1.07                    |
|                                | POPC : POPC/LPC14                                   | 44.37 ± 0.93                    |
|                                | POPC : POPC/LPC16                                   | 44.23 ± 0.92                    |
|                                | POPC/PIP <sub>2</sub> : POPC/DAG (n=1)              | 38.24 ± 0.94                    |
|                                | POPC/PIP <sub>2</sub> : POPC/DAG (n=2)              | 38.79 ± 1.04                    |

## Supplementary Figures

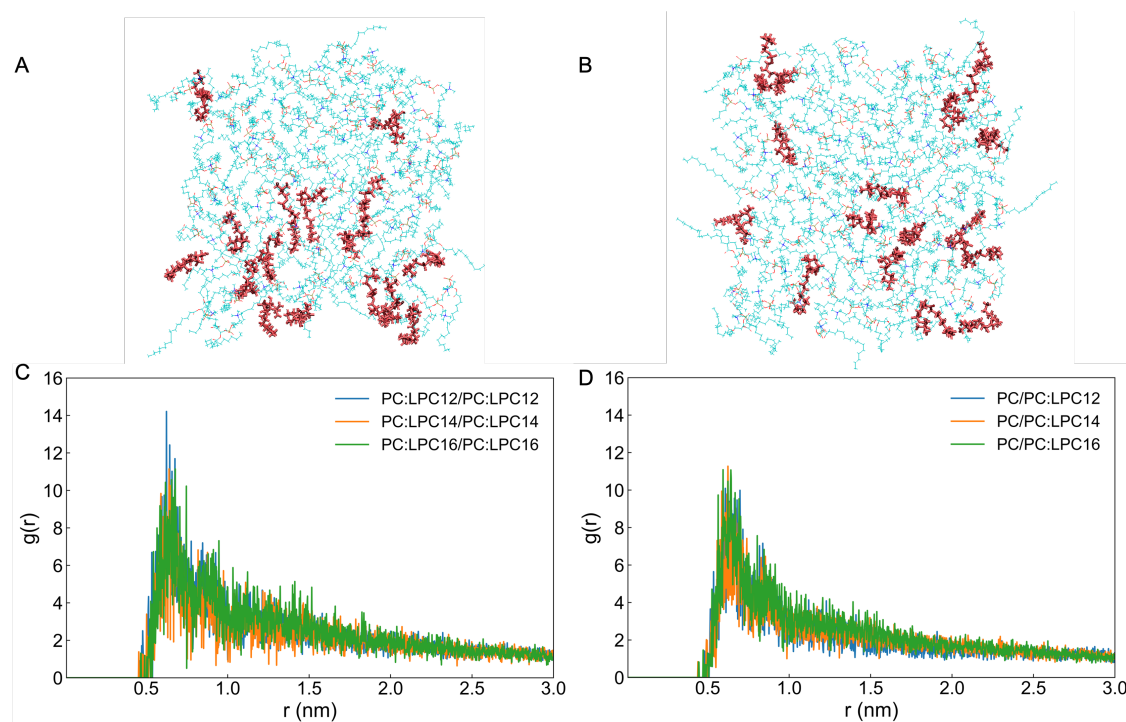

**Figure S1:** Snapshots of the LPC12 insertion system showing (A) transient local clustering and (B) dispersed distribution. Radial distribution functions for bilayers with symmetric (C) and asymmetric (D) LPC insertion, obtained by concatenating the final 200 ns from each of five independent replicate trajectories.

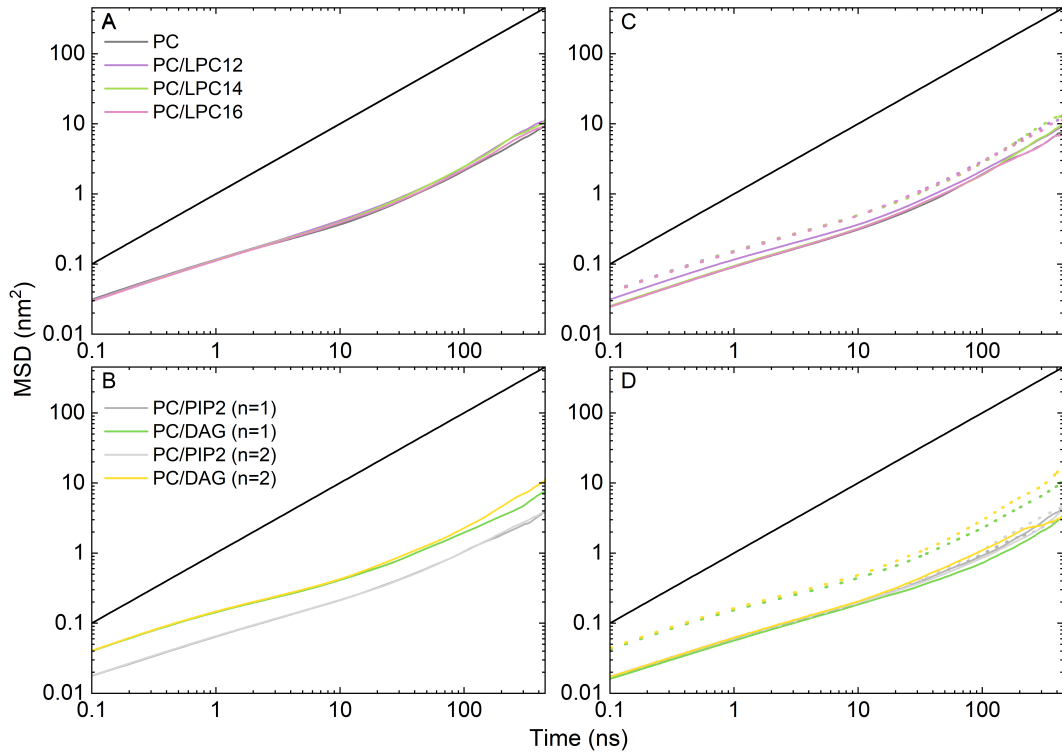

**Figure S2:** Two-dimensional mean square displacement (MSD) of lipid molecules in bilayer systems with symmetric LPC insertion and PIP<sub>2</sub>-DAG conversion (A, B), or with asymmetric LPC insertion and PIP<sub>2</sub>-DAG conversion (C, D). The solid and dotted lines in panels (C) and (D) represent the MSD of lipid molecules in the upper and lower leaflets, respectively.

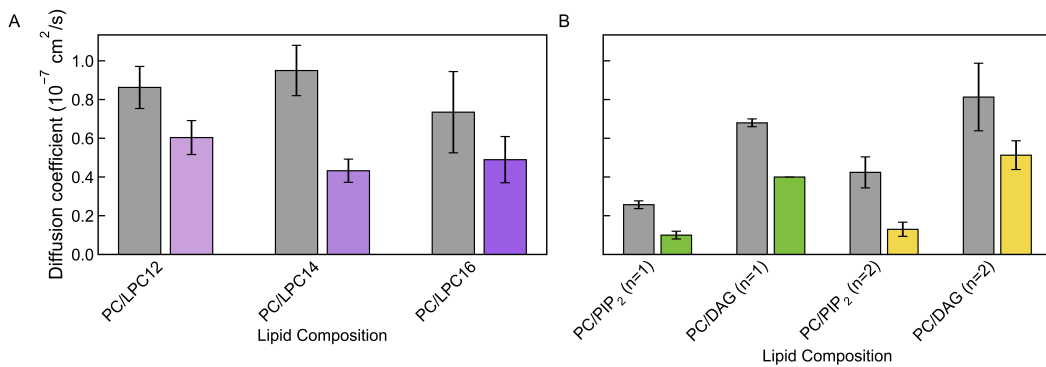

**Figure S3:** Lateral diffusion coefficients of LPC (A) and PIP<sub>2</sub>/DAG (B) in symmetric and asymmetric bilayer systems. In each set of histograms, the left (gray) and right (colored) histograms correspond to symmetric and asymmetric systems, respectively. *n* denotes the degree of unsaturation.

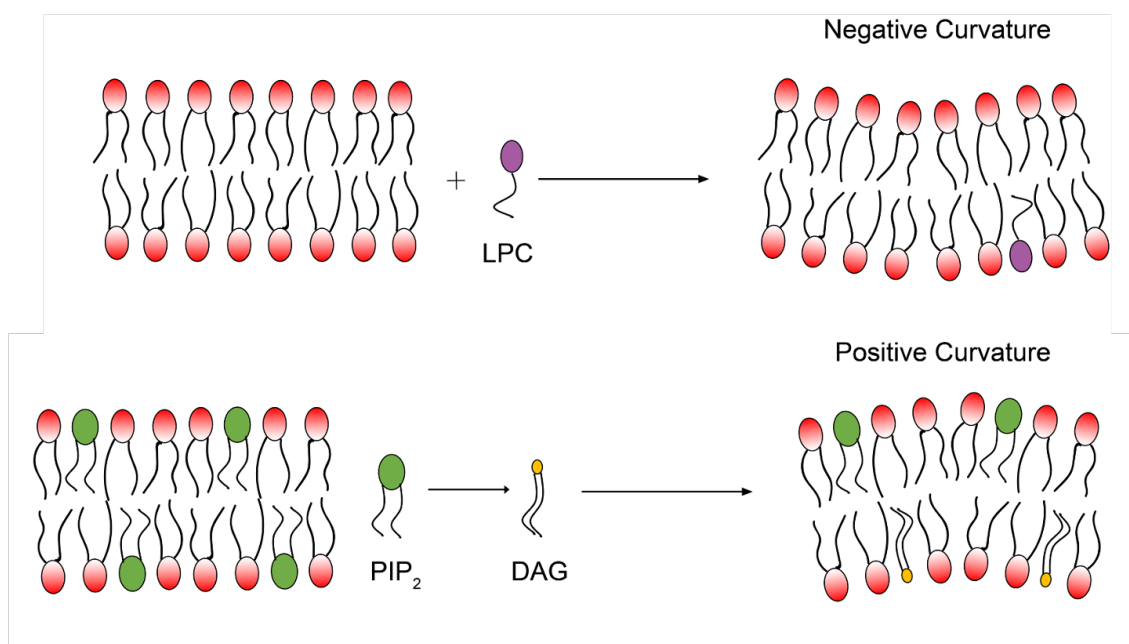

**Figure S4:** The curvature trends with different lipid compositions. The direction of membrane curvature was defined from the perspective of an observer located below the lower leaflet of the bilayer, looking towards the upper leaflet. A concave curvature of the membrane (bending away from the lower leaflet) was defined as positive, while a convex curvature (bending toward the lower leaflet) was defined as negative.
